# Supplementary material
Source: PubMed Central journal article supplement (PMC8420279)
Supplement: BIOT-16-0-s001.pdf [file BIOT-16-0-s001.pdf]

# Supplementary figure 1

**a**

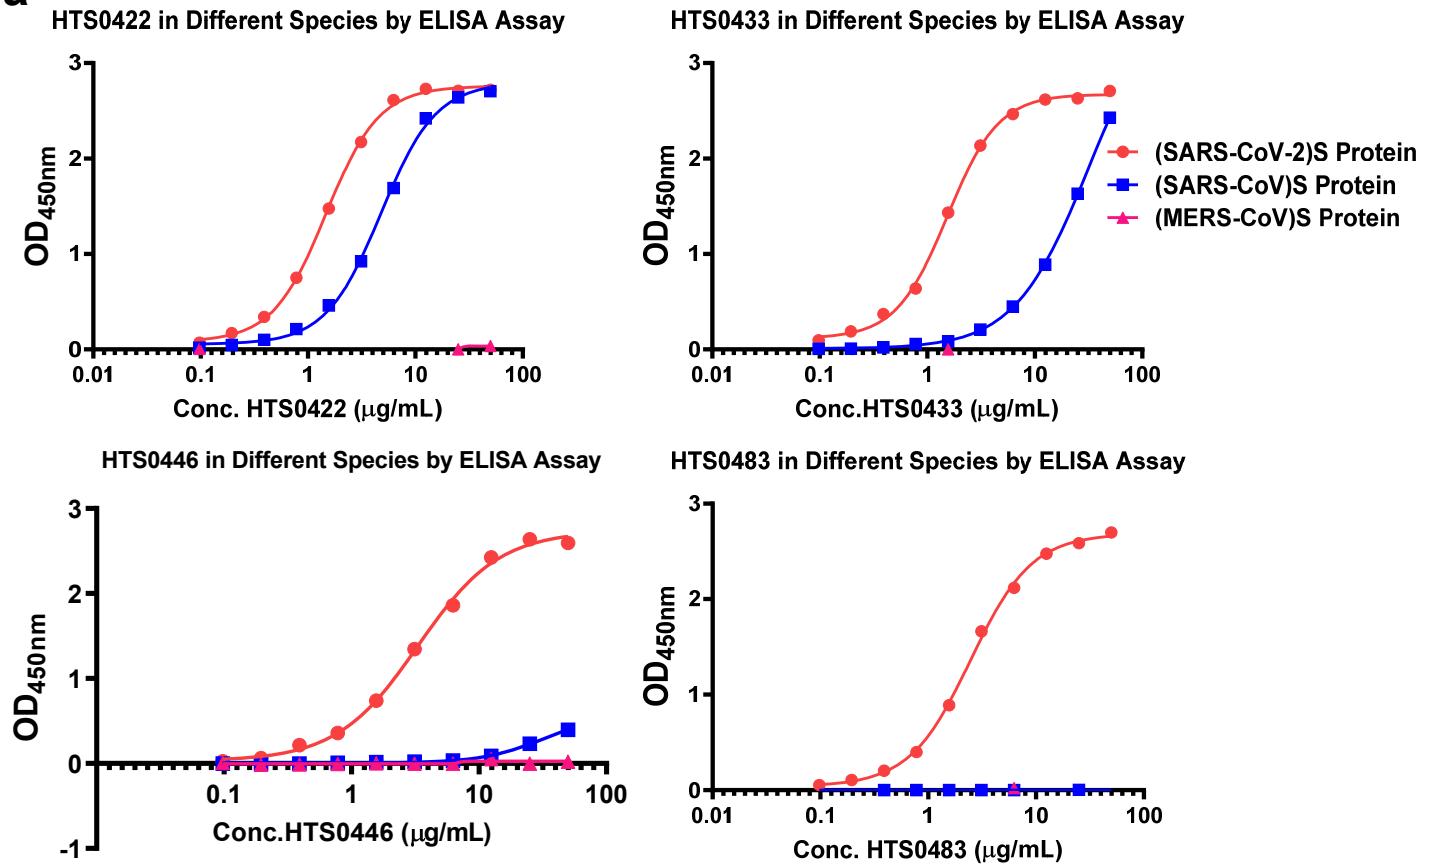

**b**

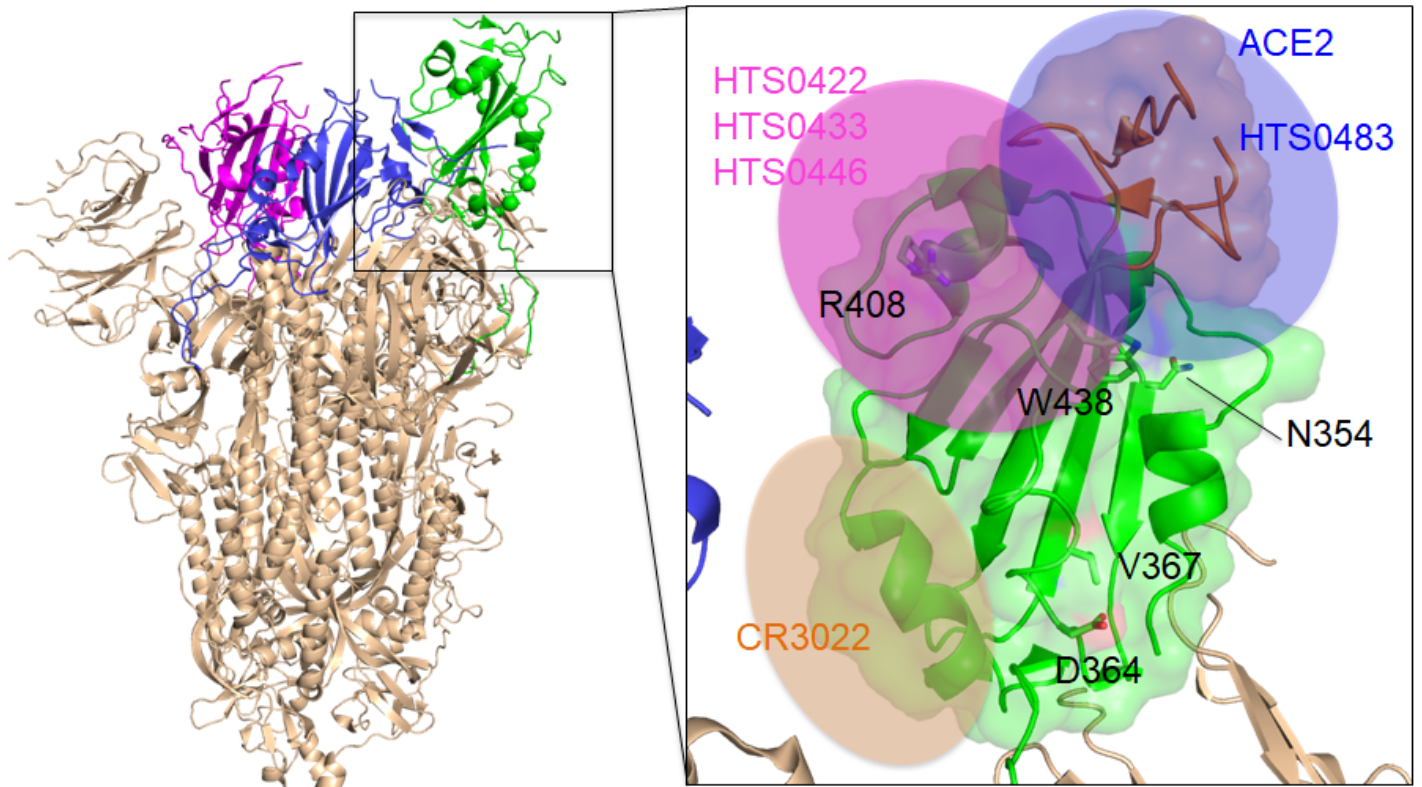

Supplementary Tables 1

| Clone Information |          |          | Sequence Information |           |            |                          | AA Seq.                                                                                                                             |
|-------------------|----------|----------|----------------------|-----------|------------|--------------------------|-------------------------------------------------------------------------------------------------------------------------------------|
| SN                | Clone ID | Germline | CDR1                 | CDR2      | CDR3       |                          |                                                                                                                                     |
| 1                 | HTS0390  | VH       | IGHV3-53*04          | GVTVSSNY  | IYSGGST    | ARDLVSSGMDV              | QVQLVQSGGGLVQPGGSLRLSCAASGVTVSSNYMSVWRQAPGKLEWVSVIYSGGSTYYADSVKGRFTISRHNKNTLYLQMNLSRAEDTAVYYCARDLVSSGMDVWVGQGTIVTVSS                |
|                   |          | VL       | IGKV1-12*01          | QGISSW    | AAS        | QQANSFPPA                | DIVMTQSPSSVSASVGDRTVITCRASQGISSWLAWEYQQKPGKAPKLLIYAASLQSGVPSRFSGSGSDFTLTISSLQPEDFATYYCQQANSFPPAFPGGPKTKVDIK                         |
| 2                 | HTS0414  | VH       | IGHV1-18*01          | GVTFTSYG  | ISAYHGNT   | ARGLAPSYCGGDCYPRAPFDY    | EVQLVQSGAEVVKPGASVKVSCASGYFTFSYGISVWRQAPGGLEWVMSWISAYHGNTNAYAKLQGRVTMTDTSTAYMELRSLRSDDTAVYYCARGLAPSYCGGDCYPRAPFDYWGQGLTVTVSS        |
|                   |          | VL       | IGKV1-39*01          | QSISSY    | AAS        | QQSYSTPYT                | DIQLTQSPSSLSASVGDRTVITCRASQSISSYLWYQQKPGKAPKLLIYAASLQSGVPSRFSGSGSDFTLTISSLQPEDFATYYCQQSYSTPYTFGGGKLEIK                              |
| 3                 | HTS0422  | VH       | IGHV3-9*01           | GFTFDDYA  | ISWNSGSI   | AKEDAGYYDDSSGYYPKAWHYFDL | EVQLVESGGGLVQPGGSLRLSCAASGFTFDDYAMHWVVRQAPGKLEWVSGISWNSGSIYADSVKGRFTISRDNNAKNSLYLQMNLSRAEDTALYYCAKEDAGYYDDSSGYYPKAWHYFDLWGRGTMVTVSS |
|                   |          | VL       | IGKV1-39*01          | QSISSY    | AAS        | QQSHSTPYT                | AIQMTQSPSSLSASVGDRTVITCRASQSISSYLWYQQKPGKAPKLLIYAASLQSGVPSRFSGSGSDFTLTISSLQPEDFATYYCQQSHSTPYTFGGGKTKVEIK                            |
| 4                 | HTS0433  | VH       | IGHV3-9*01           | GFTFDDYA  | ISWNSGSI   | AKEDAGYYDDSSGYYPKAWHYFDL | EVQLVESGGGLVQPGGSLRLSCAASGFTFDDYAMHWVVRQAPGKLEWVSGISWNSGSIYADSVKGRFTISRDNNAKNSLYLQMNLSRAEDTALYYCAKEDAGYYDDSSGYYPKAWHYFDLWGRGLTVTVSS |
|                   |          | VL       | IGKV1-39*01          | QSISSY    | AAS        | QQSYSTPRT                | DIVMTQSPSSLSASVGDRTVITCRASQSISSYLWYQQKPGKAPKLLIYAASLQSGVPSRFSGSGSDFTLTISSLQPEDFATYYCQQSYSTPRTFGGGKTKLEIK                            |
| 5                 | HTS0446  | VH       | IGHV3-9*01           | GFTFDDYA  | ISWNSGSI   | AKEDAGYYDDSSGYYPKAWHYFDL | QVQLVQSGGGLVQPGGSLRLSCAASGFTFDDYAMHWVVRQAPGKLEWVSGISWNSGSIYADSVKGRFTISRDNNAKNSLYLQMNLSRAEDTALYYCAKEDAGYYDDSSGYYPKAWHYFDLWGRGLTVTVSS |
|                   |          | VL       | IGKV1-39*01          | QSISSY    | AAS        | QQSYSTPRT                | AIRMTQSPSSLSASVGDRTVITCRASQSISSYLWYQQKPGKAPKLLIYAASLQSGVPSRFSGSGSDFTLTISSLQPEDFATYYCQQSYSTPRTFGGGKTKVEIK                            |
| 6                 | HTS0461  | VH       | IGHV3-53*01          | GFTVSSNY  | IYSGGST    | ARDLVVFGMDV              | EVQLVESGGGLIQPGGSLRLSCAASGFTVSSNYMSVWRQAPGKLEWVSVIYSGGSTYYADSVKGRFTISRDNNAKNSLYLQMNLSRAEDTAVYYCARDLVVFGMDVWVGQGTIVTVSS              |
|                   |          | VL       | IGKV1-12*01          | QGISSW    | AAS        | QQAEA                    | AIRMTQSPSSVSASVGDRTVITCRASQGISSWLAWEYQQKPGKAPKLLIYAASLQSGVPSRFSGSGSDFTLTISSLQPEDFATYYCQQAEAFGGGKTKVEIK                              |
| 7                 | HTS0472  | VH       | IGHV3-53*04          | GVTVSSNY  | IYSGGST    | ARDLVSSGMDV              | EVQLVETGGGLVQPGGSLRLSCAASGVTVSSNYMSVWRQAPGKLEWVSVIYSGGSTYYADSVKGRFTISRHNKNTLYLQMNLSRAEDTAVYYCARDLVSSGMDVWVGQGTIVTVSS                |
|                   |          | VL       | IGKV1-9*01           | QIISY     | AAS        | QQLNSYPFT                | EIVLTQSPSFLSASVGDRTVITCRASQIISYLWYQQEFGKAPKLLIYAESTLQGGVPSRFSGSGSDEFTLTISSLQPEDFATYYCQQLNSYPFTFGGGKTKVEIK                           |
| 8                 | HTS0476  | VH       | IGHV3-53*04          | GVTVSSNY  | IYSGGST    | ARDLVSSGMDV              | EVQLVQSGGGLVQPGGSLRLSCAASGVTVSSNYMSVWRQAPGKLEWVSVIYSGGSTYYADSVKGRFTISRHNKNTLYLQMNLSRAEDTAVYYCARDLVSSGMDVWVGQGTIVTVSS                |
|                   |          | VL       | IGKV1-9*01           | QGISSY    | AAS        | QQLNSYPPT                | AIQLTQSPSFLSASVGDRTVITCRASQGISSYLWYQQKPGKAPKLLIYAESTLQSGVPSRFSGSGSDEFTLTISSLQPEDFATYYCQQLNSYPPTFGGGKTKVEIK                          |
| 9                 | HTS0477  | VH       | IGHV1-18*01          | GVTFTSYG  | ISGFHGNT   | ARGLAPSYCGGDCYPRAPFDY    | EVQLVQSGAEVVKPGASVKVSCASGYFTFSYGISVWRQAPGGLEWVMSWISGFHGNTNAYAKLQGRVTMTDTSTAYMELRSLRSDDTAVYYCARGLAPSYCGGDCYPRAPFDYWGQGLTVTVSS        |
|                   |          | VL       | IGKV1-39*01          | QSISSY    | AAS        | QQSYSTLLT                | AIQLTQSPSSLSASVGDRTVITCRASQSISSYLWYQQKPGKAPKLLIYAASLQSGVPSRFSGSGSDFTLTISSLQPEDFATYYCQQSYSTLLTFGGGKTKVEIK                            |
| 10                | HTS0478  | VH       | IGHV3-53*02          | GFTVGSNY  | IYSGGST    | ARDLVVYGMV               | EVQLVETGGGLIQPGGSLRLSCAASGFTVGSNYMSVWRQAPGKLEWVSLIYSGGSTYYADSVKGRFTISRDNNAKNSLYLQMNLSRAEDTAVYYCARDLVVYGMVWVGQGTIVTVSS               |
|                   |          | VL       | IGKV1-9*01           | QGISSY    | AAS        | QQLNSYPPT                | DIVMTQSPSFLSASVGDRTVITCRASQGISSYLWYQQKPGKAPKLLIYAESTLQSGVPSRFSGSGSDEFTLTISSLQPEDFATYYCQQLNSYPPTFGGGKTKVEIK                          |
| 11                | HTS0483  | VH       | IGHV3-66*01          | GITVSSNY  | IYSGGST    | ARDLQERGGMDV             | QVQLVESGGGLVQPGGSLRLSCAASGITVSSNYMSVWRQAPGKLEWVSVIYSGGSTYYADSVKGRFISRDNNAKNSLYLQMNLSRAEDTAVYYCARDLQERGGMDVWVGQGTIVTVSS              |
|                   |          | VL       | IGKV3D-20*0          | QSVSSSY   | DAS        | QQYGSPLT                 | EIVLTQSPATLSLSPGERATLSCGASQSVSSYLAWYQQKPGAPKLLIYDASSRATGIPDRFSGSGSDFTLTISSLQPEDFATYYCQQYGSPLTFGGGKTKVEIK                            |
| 12                | HTS0777  | VH       | IGHV3-66*01          | GITVSSNY  | IYSGGST    | ARDLQERGGMDV             | QVQLVESGGGLVQPGGSLRLSCAASGITVSSNYMSVWRQAPGKLEWVSVIYSGGSTYYADSVKGRFISRDNNAKNSLYLQMNLSRAEDTAVYYCARDLQERGGMDVWVGQGTIVTVSS              |
|                   |          | VL       | IGKV1-5*03           | QAISNW    | EAS        | QQYGNWYT                 | DIQLTQSPSTLSASVGDRTVITCRASQAISNWLAWYQQKPGKAPKLLIYASNLESGVPSRFSGSGSDEFTLTISSLQPEDFATYYCQQYGNWYTFGGGKTKVEIK                           |
| 13                | HTS0778  | VH       | IGHV3-9*01           | GFTFDDYA  | ISWNSGSI   | AKEDAGYYDDSSGYYPKAWHYFDL | QVQLVQSGGGLVQPGGSLRLSCAASGFTFDDYAMHWVVRQAPGKLEWVSGISWNSGSIYADSVKGRFTISRDNNAKNSLYLQMNLSRAEDTALYYCAKEDAGYYDDSSGYYPKAWHYFDLWGRGLTVTVSS |
|                   |          | VL       | IGKV1-39*01          | QSISSY    | AAS        | QQSYSTPLT                | DIQLTQSPSSLSASVGDRTVITCRASQSISSYLWYQQKPGKAPKLLIYAASLQSGVPSRFSGSGSDFTLTISSLQPEDFATYYCQQSYSTPLTFGGGKTKLEIK                            |
| 14                | HTS0889  | VH       | IGHV3-30*04          | GFTFSTYA  | ISYDGSNK   | ARVKGKRVFLGGMDV          | EVQLLESGGGVVQPGGSLRLSCAASGFTFSTYAMHWVVRQAPGKLEWVAVISYDGSNKYYADSVKGRFTISRDNNAKNSLYLQMNLSRAEDTAVYYCARVKGKRVFLGGMDVWVGQGTIVTVSS        |
|                   |          | VL       | IGKV2-28*01          | QSLHNSGY  | LGS        | MQUALQTPYT               | DIVMTQPPLSLPVTGPEPASICRSSLHNSGNYLWYDYLQKPGQSPQLLIYLSNRSASVGPDRFSGSGSDFTLTISSLQPEDFATYYCQYQYGNWYTFGGGKTKVEIK                         |
| 15                | HTS0896  | VH       | IGHV3-53*01          | GFTVSRNY  | IYSGGST    | ARDLVVYGMV               | EVQLVQSGGGLIQPGGSLRLSCAASGFTVSRNYMSVWRQAPGKLEWVSVIYSGGSTYYADSVKGRFTISRDNNAKNSLYLQMNLSRAEDTAVYYCARDLVVYGMVWVGQGTIVTVSS               |
|                   |          | VL       | IGKV1-12*01          | QGISSW    | GAS        | QQANSFPPPT               | DIQMTQSPSSVSASVGDRTVITCRASQGISSWLAWEYQQKPGKAPKLLIYASLQSGVPSRFSGSGSDFTLTISSLQPEDFATYYCQQANSFPPPTFGGGKTKVEIK                          |
| 16                | HTS0916  | VH       | IGHV3-53*02          | GFTVSSNY  | IYSGGST    | ARDLLEVGGMDV             | EVQLVETGGGLIQPGGSLRLSCAASGFTVSSNYMSVWRQAPGKLEWVSVIYSGGSTYYADSVKGRFTISRDNNAKNSLYLQMNLSRAEDTAVYYCARDLLEVGGMDVWVGQGTIVTVSS             |
|                   |          | VL       | IGKV3-20*01          | ESVSSSY   | GAS        | QQYGSPPYT                | EIVMTQSPDITLSLSPGERATLSCRASESVSSSYLAWYQQKPGQAPRLLIYGASSRATGIPDRFSGSGSDFTLTISSLQPEDFATYYCQQYGSPPYTFGGGKTKVEIK                        |
| 17                | HTS0917  | VH       | IGHV3-15*01          | EFTFSNAW  | IKSKTDGGTT | TTDQPEGYGSGSVVYVYGMV     | EVQLVESGGGLVQPGGSLRLSCAASEFTFSNAWMSVWRQAPGKLEWVSGRIKSKTDGGTTDYAAPVKGRFTISRDNNAKNSLYLQMNLSKTEDTAVYYCTDQPEGYGSGSVVYVYGMVWVGQGTIVTVSS  |
|                   |          | VL       | IGKV2-30*02          | QSLVHSDGN | KVS        | MQGTHWPPNT               | DIVMTQSPSLPVTLQGPASICRSSLVHSDGNLYLWYFQQRPQSPRRLIYKVNRSRSGVDRFSGSGSDFTLTISSLQPEDFATYYCQQGTHWPPNTFGGGKTKVEIK                          |
| 18                | HTS0922  | VH       | IGHV3-15*01          | EFTFSNAW  | IKSKTDGGTT | TTDQPEGYGSGSVVYVYGMV     | EVQLVESGGGLVQPGGSLRLSCAASGFTFSNAWMSVWRQAPGKLEWVSGRIKSKTDGGTTDYAAPVKGRFTISRDNNAKNSLYLQMNLSKTEDTAVYYCTDQPEGYGSGSVVYVYGMVWVGQGTIVTVSS  |
|                   |          | VL       | IGKV2-30*02          | QSLVHSDGN | KVS        | MQGTHWPPYT               | DIVMTQPPLSLPVTLQGPASICRSSLVHSDGNLYLWYFQQRPQSPRRLIYKVNRSRSGVDRFSGSGSDFTLTISSLQPEDFATYYCQQGTHWPPYTFGGGKTKVEIK                         |
| 19                | HTS0936  | VH       | IGHV3-53*01          | GFTVSSNY  | IYSGGST    | ARDLHVVGAFDI             | EVQLVQSGGGLIQPGGSLRLSCAASGFTVSSNYMSVWRQAPGKLEWVSVIYSGGSTYYADSVKGRFTISRDNNAKNSLYLQMNLSRAEDTAVYYCARDLHVVGAFDIWVGQGTIVTVSS             |
|                   |          | VL       | IGKV3-20*01          | QSVSSSY   | GAS        | QQYGSPPDT                | EIVLTQSPGTLSPGERATLSCRASQSVSSYLAWYQQKPGQAPRLLIYAGASSRATGIPDRFSGSGSDFTLTISSLQPEDFATYYCQQYGSPPDTFGGGKTKLEIK                           |

**Supplementary Tables 2****Human VK Front primers with NheI**

|                  |                                |
|------------------|--------------------------------|
| VK1.1 Front NheI | ACTACGGCTAGCGMCATCCAGTTGACCCAG |
| VK1.2 Front NheI | ACTACGGCTAGCGCCATCCRGATGACCCAG |
| VK1.3 Front NheI | ACTACGGCTAGCRACATCCAGATGACCCAG |
| VK1.4 Front NheI | ACTACGGCTAGCGYCATCTGGATGACCCAG |
| VK2.1 Front NheI | ACTACGGCTAGCGATRTTGTGATGACTCAG |
| VK2.2 Front NheI | ACTACGGCTAGCGAKATTGTGATGACCCAG |
| VK3.1 Front NheI | ACTACGGCTAGCGAAATTGTGTTGACRCAG |
| VK3.2 Front NheI | ACTACGGCTAGCGAAATAGTGATGAYGCAG |
| VK3.3 Front NheI | ACTACGGCTAGCGAAATTGTAATGACACAG |
| VK4 Front NheI   | ACTACGGCTAGCGACATCGTGATGACCCAG |
| VK5 Front NheI   | ACTACGGCTAGCGAAACGACACTCACGCAG |
| VK6 Front NheI   | ACTACGGCTAGCGAAATTGTGCTGACTCAG |

**Human VK back primers with NotI**

|               |                                     |
|---------------|-------------------------------------|
| VK1 Back NotI | CAGAATGCGGCCGCTTTGATTTCCACCTTGGTCCC |
| VK2 Back NotI | CAGAATGCGGCCGCTTTGATCTCCAGCTTGGTCCC |
| VK3 Back NotI | CAGAATGCGGCCGCTTTGATATCCACTTTGGTCCC |
| VK4 Back NotI | CAGAATGCGGCCGCTTTGATCTCCACCTTGGTCCC |
| VK5 Back NotI | CAGAATGCGGCCGCTTTAATCTCCAGTCGTGTCCC |

**Human VH Front primers with SfiI**

|                  |                                       |
|------------------|---------------------------------------|
| VH1.1 Front SfiI | TACTCGCGGCCAGCCGGCCAGGTKCAGCTGGTGCAG  |
| VH1.2 Front SfiI | TACTCGCGGCCAGCCGGCCSAGGTCCAGCTGGTACAG |
| VH1.3 Front SfiI | TACTCGCGGCCAGCCGGCCAGGTCCAGCTTGTGCAG  |
| VH1.4 Front SfiI | TACTCGCGGCCAGCCGGCCARATGCAGCTGGTGCAG  |
| VH1.5 Front SfiI | TACTCGCGGCCAGCCGGCCAGGTCCAGCTGGTGCAR  |
| VH2.1 Front SfiI | TACTCGCGGCCAGCCGGCCAGRTCACCTTGAAGGAG  |
| VH2.2 Front SfiI | TACTCGCGGCCAGCCGGCCRRGGTACCTTGAGGGAG  |
| VH3.1 Front SfiI | TACTCGCGGCCAGCCGGCCAGGTGCAGCTGGTGGAG  |
| VH3.2 Front SfiI | TACTCGCGGCCAGCCGGCCAGGTGCAGCTGTTGGAG  |
| VH3.3 Front SfiI | TACTCGCGGCCAGCCGGCCAGGTGCAWCTGGTGGAG  |
| VH3.4 Front SfiI | TACTCGCGGCCAGCCGGCCAGGTGCAGCTGTTGGAG  |
| VH3.5 Front SfiI | TACTCGCGGCCAGCCGGCCAGGTGCAGCTGGTGGAS  |
| VH3.6 Front SfiI | TACTCGCGGCCAGCCGGCCAGGTACAGCTGGTGGAG  |
| VH3.7 Front SfiI | TACTCGCGGCCAGCCGGCCGAAGTGCAGCTGGTGGAG |
| VH3.8 Front SfiI | TACTCGCGGCCAGCCGGCCAGGTGCAGCTGGTGRAG  |
| VH4.1 Front SfiI | TACTCGCGGCCAGCCGGCCAGGTGCAGCTRCAGGAG  |
| VH4.2 Front SfiI | TACTCGCGGCCAGCCGGCCAGGTACAGCTGCAGGAG  |
| VH4.3 Front SfiI | TACTCGCGGCCAGCCGGCCRGCTGCAGCTGCAGGAG  |
| VH4.4 Front SfiI | TACTCGCGGCCAGCCGGCCAGGTGCAGCTGCAGGAC  |
| VH4.5 Front SfiI | TACTCGCGGCCAGCCGGCCAGGTGCGGCTGCAGGAG  |
| VH4.6 Front SfiI | TACTCGCGGCCAGCCGGCCAGGTGCAGCTACARCAG  |
| VH5 Front SfiI   | TACTCGCGGCCAGCCGGCCARGTGCAGCTGGTGCAG  |
| VH6 Front SfiI   | TACTCGCGGCCAGCCGGCCAGGTACAGCTGCAGCAG  |
| VH7 Front SfiI   | TACTCGCGGCCAGCCGGCCAGGTGCAGCTGGTGCAA  |

**Human VH Back primers with XhoI**

|               |                                |
|---------------|--------------------------------|
| VH1 Back XhoI | CCACCACCACTCGAGACRGTGACCAGGGTG |
| VH2 Back XhoI | CCACCACCACTCGAGACGGTGACCAGGGT  |
| VH3 Back XhoI | CCACCACCACTCGAGACGGTGACCATTGT  |
| VH4 Back XhoI | CCACCACCACTCGAGACGGTGACCGTGGT  |

**Supplementary Tables 3**

| <b>Sample</b>                                   | <b>Vendor</b>  | <b>Cat.No.</b> | <b>AA fragment</b> | <b>Gene Accession #</b> |
|-------------------------------------------------|----------------|----------------|--------------------|-------------------------|
| SARS-CoV-2 S protein RBD, His Tag               | ACROBiosystems | SPD-C52H3      | Arg 319 - Lys 537  | QHD43416.1              |
| SARS-CoV-2 S protein RBD(W436R), His Tag        | ACROBiosystems | SPD-S52H7      | Arg 319 - Phe 541  | QHD43416.1              |
| SARS-CoV-2 S protein RBD(R408I), His Tag        | ACROBiosystems | SPD-S52H8      | Arg 319 - Phe 541  | QHD43416.1              |
| SARS-CoV-2 S protein RBD(N354D), His Tag        | ACROBiosystems | SPD-S52H5      | Arg 319 - Phe 541  | QHD43416.1              |
| SARS-CoV-2 S protein RBD(V367F), His Tag        | ACROBiosystems | SPD-S52H4      | Arg 319 - Phe 541  | QHD43416.1              |
| SARS-CoV-2 S protein RBD(N354D, D364Y), His Tag | ACROBiosystems | SPD-S52H3      | Arg 319 - Phe 541  | QHD43416.1              |
| SARS, S protein, His Tag                        | ACROBiosystems | SPN-S52H5      | Ser 14 - Pro 1195  | AAP13567.1              |
| MERS-CoV, S Protein, His Tag                    | ACROBiosystems | SPD-M52H6      | Glu 367 - Tyr 606  | K0BRG7-1                |
